# Supplementary material for: Race, Ethnicity, Nativity and Perceptions of Health Risk during the COVID-19 Pandemic in the US
Source: MDPI journal article supplement (doi:10.3390/ijerph182111113), 2021-10-22
Supplement: s1 [file s1]

Race, Ethnicity, Nativity and Perceptions of Health Risk during the  
COVID-19 Pandemic in the US  
**Supplementary Materials**

Thomas Jamieson, Dakota Caldwell, Barbara Gomez-Aguinaga, and Cristián Doña-Reveco  
**University of Nebraska at Omaha**

October 8, 2021

# 1 Alternative Specifications of the Models

Table S1: Ordered Logit Regression: Perceived Risk of Infection.

|                                                      | (1)                  | (2)                  | (3)                  | (4)                  |
|------------------------------------------------------|----------------------|----------------------|----------------------|----------------------|
| Hispanic/Latinx                                      | 0.205*<br>(0.087)    | 0.091<br>(0.099)     |                      |                      |
| First generation immigrant                           | 0.017<br>(0.087)     | 0.110<br>(0.106)     |                      |                      |
| Second generation immigrant                          | 0.022<br>(0.082)     | 0.083<br>(0.091)     |                      |                      |
| Third generation immigrant                           | -0.063<br>(0.059)    | -0.030<br>(0.063)    |                      |                      |
| Anxiety                                              |                      | 0.361***<br>(0.024)  |                      | 0.362***<br>(0.024)  |
| Discrimination Index                                 |                      | 0.130***<br>(0.039)  |                      | 0.129***<br>(0.039)  |
| Spanish Language                                     |                      | 0.830***<br>(0.246)  |                      | 0.753**<br>(0.258)   |
| Health Insurance                                     |                      | -0.045<br>(0.081)    |                      | -0.043<br>(0.082)    |
| White                                                |                      | 0.115<br>(0.133)     |                      | 0.096<br>(0.134)     |
| African American                                     |                      | -0.047<br>(0.138)    |                      | -0.065<br>(0.139)    |
| Native American                                      |                      | -0.140<br>(0.137)    |                      | -0.144<br>(0.137)    |
| Asian                                                |                      | -0.111<br>(0.155)    |                      | -0.090<br>(0.157)    |
| Hawaiian/Pacific Islander                            |                      | 0.363<br>(0.261)     |                      | 0.343<br>(0.267)     |
| Household Income                                     |                      | -0.056***<br>(0.017) |                      | -0.056***<br>(0.017) |
| Disabled                                             |                      | 0.145<br>(0.105)     |                      | 0.145<br>(0.105)     |
| Education                                            |                      | -0.012<br>(0.022)    |                      | -0.011<br>(0.022)    |
| Currently Working                                    |                      | 0.106+<br>(0.054)    |                      | 0.107*<br>(0.054)    |
| Male                                                 |                      | -0.070<br>(0.049)    |                      | -0.070<br>(0.049)    |
| Age                                                  |                      | 0.001<br>(0.002)     |                      | 0.001<br>(0.002)     |
| Hispanic/Latinx $\times$ First generation immigrant  |                      |                      | 0.359*<br>(0.146)    | 0.279+<br>(0.162)    |
| Hispanic/Latinx $\times$ Second generation immigrant |                      |                      | 0.205+<br>(0.119)    | 0.159<br>(0.124)     |
| Hispanic/Latinx $\times$ Third generation immigrant  |                      |                      | 0.068<br>(0.191)     | 0.068<br>(0.199)     |
| cut1                                                 | -1.314***<br>(0.036) | -1.256***<br>(0.198) | -1.322***<br>(0.036) | -1.275***<br>(0.200) |
| cut2                                                 | -0.147***<br>(0.031) | -0.047<br>(0.196)    | -0.154***<br>(0.031) | -0.065<br>(0.198)    |
| cut3                                                 | 0.393***<br>(0.032)  | 0.516**<br>(0.196)   | 0.386***<br>(0.032)  | 0.498*<br>(0.197)    |
| cut4                                                 | 2.404***<br>(0.039)  | 2.571***<br>(0.198)  | 2.398***<br>(0.039)  | 2.554***<br>(0.199)  |
| Observations                                         | 149613               | 128858               | 149613               | 128858               |

Standard errors in parentheses

+  $p < 0.1$ , \*  $p < 0.05$ , \*\*  $p < 0.01$ , \*\*\*  $p < 0.001$

Table S2: Ordered Logit Regression: Perceived Risk of Infection by Subgroup.

|                                                             | (1)                  | (2)                  | (3)                  | (4)                  |
|-------------------------------------------------------------|----------------------|----------------------|----------------------|----------------------|
| Mexican                                                     | 0.331**<br>(0.102)   | 0.220+<br>(0.117)    |                      |                      |
| Puerto Rican                                                | -0.092<br>(0.248)    | -0.234<br>(0.262)    |                      |                      |
| Cuban                                                       | -0.623*<br>(0.308)   | -0.798*<br>(0.316)   |                      |                      |
| Central/South American                                      | -0.233<br>(0.237)    | -0.400<br>(0.251)    |                      |                      |
| Other Spanish                                               | 0.375+<br>(0.221)    | 0.262<br>(0.222)     |                      |                      |
| First generation immigrant                                  | 0.074<br>(0.086)     | 0.180+<br>(0.105)    |                      |                      |
| Second generation immigrant                                 | 0.031<br>(0.082)     | 0.103<br>(0.092)     |                      |                      |
| Third generation immigrant                                  | -0.068<br>(0.059)    | -0.037<br>(0.063)    |                      |                      |
| Anxiety                                                     |                      | 0.363***<br>(0.024)  |                      | 0.371***<br>(0.024)  |
| Discrimination Index                                        |                      | 0.132***<br>(0.038)  |                      | 0.128**<br>(0.039)   |
| Spanish Language                                            |                      | 0.919***<br>(0.229)  |                      | 0.768***<br>(0.230)  |
| Health Insurance                                            |                      | -0.041<br>(0.081)    |                      | -0.037<br>(0.080)    |
| White                                                       |                      | 0.167<br>(0.130)     |                      | 0.125<br>(0.133)     |
| African American                                            |                      | 0.016<br>(0.135)     |                      | -0.024<br>(0.137)    |
| Native American                                             |                      | -0.150<br>(0.138)    |                      | -0.155<br>(0.138)    |
| Asian                                                       |                      | -0.106<br>(0.157)    |                      | -0.079<br>(0.157)    |
| Hawaiian/Pacific Islander                                   |                      | 0.325<br>(0.265)     |                      | 0.260<br>(0.302)     |
| Household Income                                            |                      | -0.054**<br>(0.017)  |                      | -0.051**<br>(0.017)  |
| Disabled                                                    |                      | 0.145<br>(0.105)     |                      | 0.151<br>(0.105)     |
| Education                                                   |                      | -0.010<br>(0.022)    |                      | -0.009<br>(0.022)    |
| Currently Working                                           |                      | 0.107*<br>(0.054)    |                      | 0.103+<br>(0.054)    |
| Male                                                        |                      | -0.070<br>(0.049)    |                      | -0.070<br>(0.049)    |
| Age                                                         |                      | 0.001<br>(0.002)     |                      | 0.001<br>(0.002)     |
| Mexican $\times$ First generation immigrant                 |                      |                      | 0.705***<br>(0.147)  | 0.591***<br>(0.171)  |
| Mexican $\times$ Second generation immigrant                |                      |                      | 0.288*<br>(0.140)    | 0.247<br>(0.152)     |
| Mexican $\times$ Third generation immigrant                 |                      |                      | 0.246<br>(0.222)     | 0.285<br>(0.231)     |
| Puerto Rican $\times$ First generation immigrant            |                      |                      | -0.434<br>(0.499)    | -0.595<br>(0.519)    |
| Puerto Rican $\times$ Second generation immigrant           |                      |                      | 0.193<br>(0.305)     | 0.222<br>(0.315)     |
| Puerto Rican $\times$ Third generation immigrant            |                      |                      | -0.172<br>(0.389)    | -0.243<br>(0.444)    |
| Cuban $\times$ First generation immigrant                   |                      |                      | -0.581+<br>(0.328)   | -0.635+<br>(0.335)   |
| Cuban $\times$ Second generation immigrant                  |                      |                      | -0.503+<br>(0.265)   | -0.333<br>(0.272)    |
| Cuban $\times$ Third generation immigrant                   |                      |                      | 0.000<br>(.)         | 0.000<br>(.)         |
| Central/South American $\times$ First generation immigrant  |                      |                      | -0.221<br>(0.309)    | -0.228<br>(0.353)    |
| Central/South American $\times$ Second generation immigrant |                      |                      | -0.310<br>(0.346)    | -0.423<br>(0.294)    |
| Central/South American $\times$ Third generation immigrant  |                      |                      | 1.468*<br>(0.574)    | 1.126*<br>(0.558)    |
| Other Spanish $\times$ First generation immigrant           |                      |                      | 1.258**<br>(0.470)   | 1.144**<br>(0.431)   |
| Other Spanish $\times$ Second generation immigrant          |                      |                      | 0.250<br>(0.471)     | 0.184<br>(0.445)     |
| Other Spanish $\times$ Third generation immigrant           |                      |                      | -0.733<br>(0.539)    | -0.792<br>(0.529)    |
| cut1                                                        | -1.312***<br>(0.036) | -1.166***<br>(0.199) | -1.329***<br>(0.036) | -1.198***<br>(0.201) |
| cut2                                                        | -0.143***<br>(0.031) | 0.046<br>(0.197)     | -0.156***<br>(0.031) | 0.017<br>(0.199)     |
| cut3                                                        | 0.399***<br>(0.032)  | 0.611**<br>(0.196)   | 0.388***<br>(0.032)  | 0.584**<br>(0.199)   |
| cut4                                                        | 2.414***<br>(0.039)  | 2.671***<br>(0.199)  | 2.411***<br>(0.039)  | 2.650***<br>(0.200)  |
| Observations                                                | 149613               | 128858               | 149613               | 128858               |

Standard errors in parentheses

+  $p < 0.1$ , \*  $p < 0.05$ , \*\*  $p < 0.01$ , \*\*\*  $p < 0.001$

Table S3: Ordered Logit Regression: Perceived Risk of Dying

|                                                      | (1)                  | (2)                  | (3)                  | (4)                  |
|------------------------------------------------------|----------------------|----------------------|----------------------|----------------------|
| Hispanic/Latinx                                      | 0.222*<br>(0.089)    | 0.328**<br>(0.102)   |                      |                      |
| First generation immigrant                           | 0.084<br>(0.090)     | 0.081<br>(0.110)     |                      |                      |
| Second generation immigrant                          | 0.002<br>(0.090)     | 0.052<br>(0.097)     |                      |                      |
| Third generation immigrant                           | 0.115+<br>(0.067)    | 0.011<br>(0.069)     |                      |                      |
| Anxiety                                              |                      | 0.296***<br>(0.025)  |                      | 0.295***<br>(0.025)  |
| Discrimination Index                                 |                      | 0.091**<br>(0.033)   |                      | 0.092**<br>(0.033)   |
| Spanish Language                                     |                      | 0.865**<br>(0.269)   |                      | 0.941***<br>(0.269)  |
| Health Insurance                                     |                      | -0.136<br>(0.085)    |                      | -0.138<br>(0.085)    |
| White                                                |                      | -0.247+<br>(0.127)   |                      | -0.225+<br>(0.129)   |
| African American                                     |                      | -0.015<br>(0.132)    |                      | 0.007<br>(0.132)     |
| Native American                                      |                      | -0.022<br>(0.136)    |                      | -0.017<br>(0.136)    |
| Asian                                                |                      | 0.043<br>(0.146)     |                      | 0.034<br>(0.146)     |
| Hawaiian/Pacific Islander                            |                      | 0.044<br>(0.211)     |                      | 0.062<br>(0.208)     |
| Household Income                                     |                      | -0.136***<br>(0.018) |                      | -0.136***<br>(0.018) |
| Disabled                                             |                      | 0.263*<br>(0.118)    |                      | 0.262*<br>(0.118)    |
| Education                                            |                      | -0.143***<br>(0.024) |                      | -0.144***<br>(0.024) |
| Currently Working                                    |                      | -0.166**<br>(0.055)  |                      | -0.168**<br>(0.055)  |
| Male                                                 |                      | -0.099+<br>(0.053)   |                      | -0.098+<br>(0.053)   |
| Age                                                  |                      | 0.025***<br>(0.002)  |                      | 0.025***<br>(0.002)  |
| Hispanic/Latinx $\times$ First generation immigrant  |                      |                      | 0.349**<br>(0.126)   | 0.332*<br>(0.139)    |
| Hispanic/Latinx $\times$ Second generation immigrant |                      |                      | 0.251*<br>(0.118)    | 0.423***<br>(0.115)  |
| Hispanic/Latinx $\times$ Third generation immigrant  |                      |                      | 0.184<br>(0.218)     | 0.274<br>(0.203)     |
| cut1                                                 | -1.174***<br>(0.037) | -1.229***<br>(0.196) | -1.175***<br>(0.037) | -1.207***<br>(0.196) |
| cut2                                                 | -0.283***<br>(0.034) | -0.266<br>(0.194)    | -0.284***<br>(0.034) | -0.244<br>(0.195)    |
| cut3                                                 | 0.604***<br>(0.036)  | 0.714***<br>(0.195)  | 0.603***<br>(0.036)  | 0.737***<br>(0.195)  |
| cut4                                                 | 1.383***<br>(0.041)  | 1.569***<br>(0.195)  | 1.382***<br>(0.041)  | 1.592***<br>(0.195)  |
| Observations                                         | 149572               | 128843               | 149572               | 128843               |

Standard errors in parentheses

+  $p < 0.1$ , \*  $p < 0.05$ , \*\*  $p < 0.01$ , \*\*\*  $p < 0.001$

Table S4: Ordered Logit Regression: Perceived Risk of Dying by Subgroup.

|                                                      | (1)                  | (2)                  | (3)                  | (4)                  |
|------------------------------------------------------|----------------------|----------------------|----------------------|----------------------|
| Mexican                                              | 0.320**<br>(0.103)   | 0.438***<br>(0.120)  |                      |                      |
| Puerto Rican                                         | -0.047<br>(0.229)    | 0.015<br>(0.215)     |                      |                      |
| Cuban                                                | -0.082<br>(0.179)    | -0.279<br>(0.252)    |                      |                      |
| Central/South American                               | -0.109<br>(0.226)    | 0.045<br>(0.257)     |                      |                      |
| Other Spanish                                        | 0.310<br>(0.235)     | 0.398+<br>(0.221)    |                      |                      |
| First generation immigrant                           | 0.116<br>(0.091)     | 0.124<br>(0.111)     |                      |                      |
| Second generation immigrant                          | 0.010<br>(0.091)     | 0.064<br>(0.098)     |                      |                      |
| Third generation immigrant                           | 0.112+<br>(0.067)    | 0.005<br>(0.069)     |                      |                      |
| Anxiety                                              |                      | 0.297***<br>(0.025)  |                      | 0.299***<br>(0.025)  |
| Discrimination Index                                 |                      | 0.093**<br>(0.034)   |                      | 0.091**<br>(0.034)   |
| Spanish Language                                     |                      | 0.923***<br>(0.257)  |                      | 0.954***<br>(0.258)  |
| Health Insurance                                     |                      | -0.133<br>(0.085)    |                      | -0.131<br>(0.085)    |
| White                                                |                      | -0.207<br>(0.126)    |                      | -0.197<br>(0.127)    |
| African American                                     |                      | 0.037<br>(0.131)     |                      | 0.052<br>(0.132)     |
| Native American                                      |                      | -0.031<br>(0.136)    |                      | -0.022<br>(0.137)    |
| Asian                                                |                      | 0.054<br>(0.147)     |                      | 0.045<br>(0.143)     |
| Hawaiian/Pacific Islander                            |                      | 0.024<br>(0.210)     |                      | 0.028<br>(0.212)     |
| Household Income                                     |                      | -0.135***<br>(0.018) |                      | -0.132***<br>(0.018) |
| Disabled                                             |                      | 0.266*<br>(0.118)    |                      | 0.269*<br>(0.118)    |
| Education                                            |                      | -0.141***<br>(0.024) |                      | -0.140***<br>(0.024) |
| Currently Working                                    |                      | -0.167**<br>(0.055)  |                      | -0.170**<br>(0.055)  |
| Male                                                 |                      | -0.099+<br>(0.053)   |                      | -0.103+<br>(0.053)   |
| Age                                                  |                      | 0.025***<br>(0.002)  |                      | 0.025***<br>(0.002)  |
| Mexican × First generation immigrant                 |                      |                      | 0.700***<br>(0.126)  | 0.662***<br>(0.153)  |
| Mexican × Second generation immigrant                |                      |                      | 0.278*<br>(0.139)    | 0.499***<br>(0.141)  |
| Mexican × Third generation immigrant                 |                      |                      | 0.251<br>(0.246)     | 0.342<br>(0.239)     |
| Puerto Rican × First generation immigrant            |                      |                      | -0.256<br>(0.496)    | -0.455<br>(0.373)    |
| Puerto Rican × Second generation immigrant           |                      |                      | 0.303<br>(0.278)     | 0.324<br>(0.245)     |
| Puerto Rican × Third generation immigrant            |                      |                      | -0.469<br>(0.288)    | -0.187<br>(0.333)    |
| Cuban × First generation immigrant                   |                      |                      | 0.050<br>(0.181)     | -0.197<br>(0.257)    |
| Cuban × Second generation immigrant                  |                      |                      | -0.247<br>(0.229)    | 0.094<br>(0.455)     |
| Cuban × Third generation immigrant                   |                      |                      | 0.000<br>(.)         | 0.000<br>(.)         |
| Central/South American × First generation immigrant  |                      |                      | -0.152<br>(0.251)    | -0.050<br>(0.300)    |
| Central/South American × Second generation immigrant |                      |                      | -0.006<br>(0.417)    | 0.308<br>(0.416)     |
| Central/South American × Third generation immigrant  |                      |                      | 2.317*<br>(0.921)    | 2.408*<br>(0.951)    |
| Other Spanish × First generation immigrant           |                      |                      | 0.497<br>(0.527)     | 0.588<br>(0.442)     |
| Other Spanish × Second generation immigrant          |                      |                      | 0.253<br>(0.518)     | 0.271<br>(0.378)     |
| Other Spanish × Third generation immigrant           |                      |                      | 0.262<br>(0.816)     | 0.149<br>(0.660)     |
| cut1                                                 | -1.172***<br>(0.037) | -1.155***<br>(0.197) | -1.179***<br>(0.038) | -1.127***<br>(0.198) |
| cut2                                                 | -0.281***<br>(0.034) | -0.191<br>(0.196)    | -0.286***<br>(0.034) | -0.161<br>(0.197)    |
| cut3                                                 | 0.607***<br>(0.036)  | 0.791***<br>(0.196)  | 0.605***<br>(0.036)  | 0.823***<br>(0.197)  |
| cut4                                                 | 1.388***<br>(0.041)  | 1.647***<br>(0.197)  | 1.387***<br>(0.041)  | 1.680***<br>(0.198)  |
| Observations                                         | 149572               | 128843               | 149572               | 128843               |

Standard errors in parentheses

+  $p < 0.1$ , \*  $p < 0.05$ , \*\*  $p < 0.01$ , \*\*\*  $p < 0.001$
